# Supplementary material for: Large-scale analysis of transcriptional cis-regulatory modules reveals both common features and distinct subclasses
Source: PubMed Central journal article supplement (PMC2394749; doi:10.1186/gb-2007-8-6-r101), 2007-06-05
Supplement: gb-2007-8-6-r101-S1.pdf [file gb-2007-8-6-r101-S1.pdf]

## **Additional Data File 1: Sequence-level properties of the REDfly analysis CRMs**

**Figure S1-1.** Basic properties of the REDfly analysis CRMs. (A) Histogram of the CRM lengths. (B) Stages at which the CRMs positively regulate gene expression. CRMs can act at more than one stage. (C) Tissues in which CRMs positively regulate gene expression. CRMs can be active in more than one tissue. An alternative breakdown of tissues is given in Fig. S1-2. (D) Location of the CRMs with respect to the transcription start sites of their associated genes. Locations were determined based on *Drosophila* release 4.3 sequence annotations. For purposes of this study, we defined any CRM wholly contained within the 500 bp 5' to the TSS, or overlapping the TSS and extending not more than 500 bp 5', as "promoter proximal" and any CRM entirely located more than 500 bp 5' of the TSS as "distal." Those CRMs whose 3' end was <500 bp from the TSS but whose 5' was >500 bp from the TSS were considered "indeterminate." CRMs associated with genes with multiple transcripts were labeled "mixed" if they did not fall into the same location category for all transcripts.

**Figure S1-1**  
Li et al.

**A** Size distribution of 280 CRMs

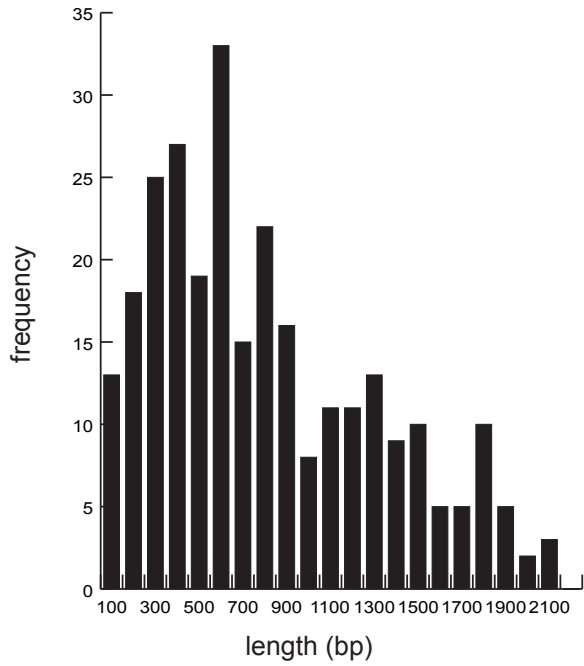

**B** Stages of activity of 280 CRMs

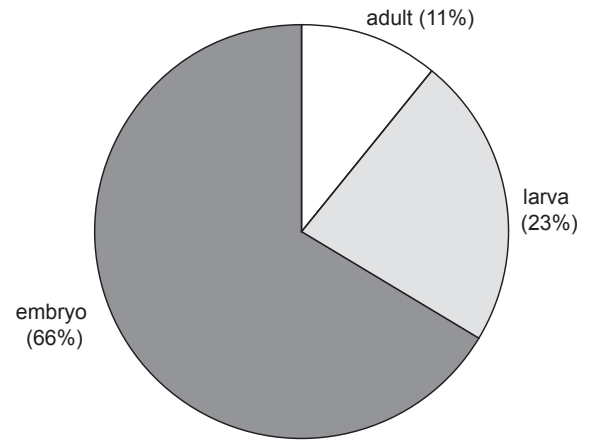

**C** Tissue specificity governed by 280 CRMs

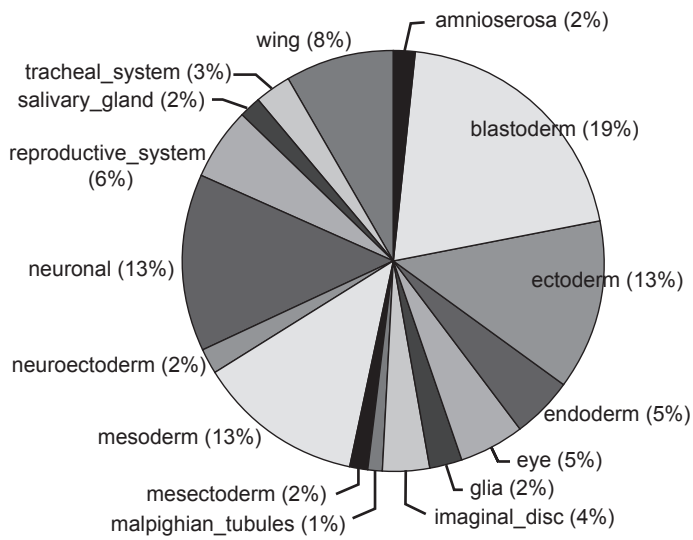

**D** Location of 280 CRMs

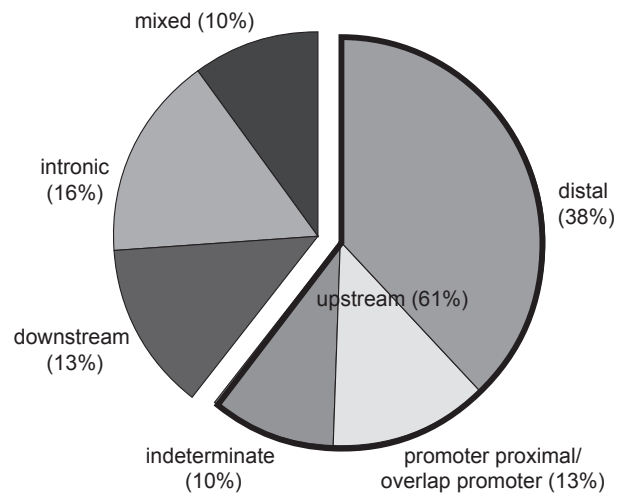

**Table S1-1: GO terms representing  $\geq 10\%$  of genes associated with the REDfly analysis CRMs**

| GO Term                                                        | GO ID      | % of Genes |
|----------------------------------------------------------------|------------|------------|
| <b>molecular function</b>                                      |            |            |
| binding                                                        | GO:0005488 | 81%        |
| nucleic acid binding                                           | GO:0003676 | 56%        |
| transcription regulator activity                               | GO:0030528 | 54%        |
| DNA binding                                                    | GO:0003677 | 49%        |
| transcription factor activity                                  | GO:0003700 | 41%        |
| protein binding                                                | GO:0005515 | 26%        |
| signal transducer activity                                     | GO:0004871 | 19%        |
| catalytic activity                                             | GO:0003824 | 19%        |
| hydrolase activity                                             | GO:0016787 | 10 %       |
| structural molecule activity                                   | GO:0005198 | 10%        |
| <b>biological process</b>                                      |            |            |
| physiological process                                          | GO:0007582 | 94%        |
| development                                                    | GO:0007275 | 83%        |
| metabolism                                                     | GO:0008152 | 76%        |
| primary metabolism                                             | GO:0044238 | 74%        |
| regulation of biological process                               | GO:0050789 | 65%        |
| nucleobase, nucleoside, nucleotide and nucleic acid metabolism | GO:0006139 | 60%        |
| transcription                                                  | GO:0006350 | 58%        |
| morphogenesis                                                  | GO:0009653 | 51%        |
| cell differentiation                                           | GO:0030154 | 46%        |
| embryonic development                                          | GO:0009790 | 44%        |
| cell communication                                             | GO:0007154 | 29%        |
| signal transduction                                            | GO:0007165 | 26%        |
| reproduction                                                   | GO:0000003 | 25%        |
| cell organization and biogenesis                               | GO:0016043 | 24%        |
| cell proliferation                                             | GO:0008283 | 19%        |
| protein metabolism                                             | GO:0019538 | 14%        |
| behavior                                                       | GO:0007610 | 11%        |
| response to biotic stimulus                                    | GO:0009607 | 10%        |

Figure S1-2. Alternative mapping of CRMs to tissues in which they regulated gene expression (cf. Fig. S1-1C). CRMs can be active in more than one tissue.

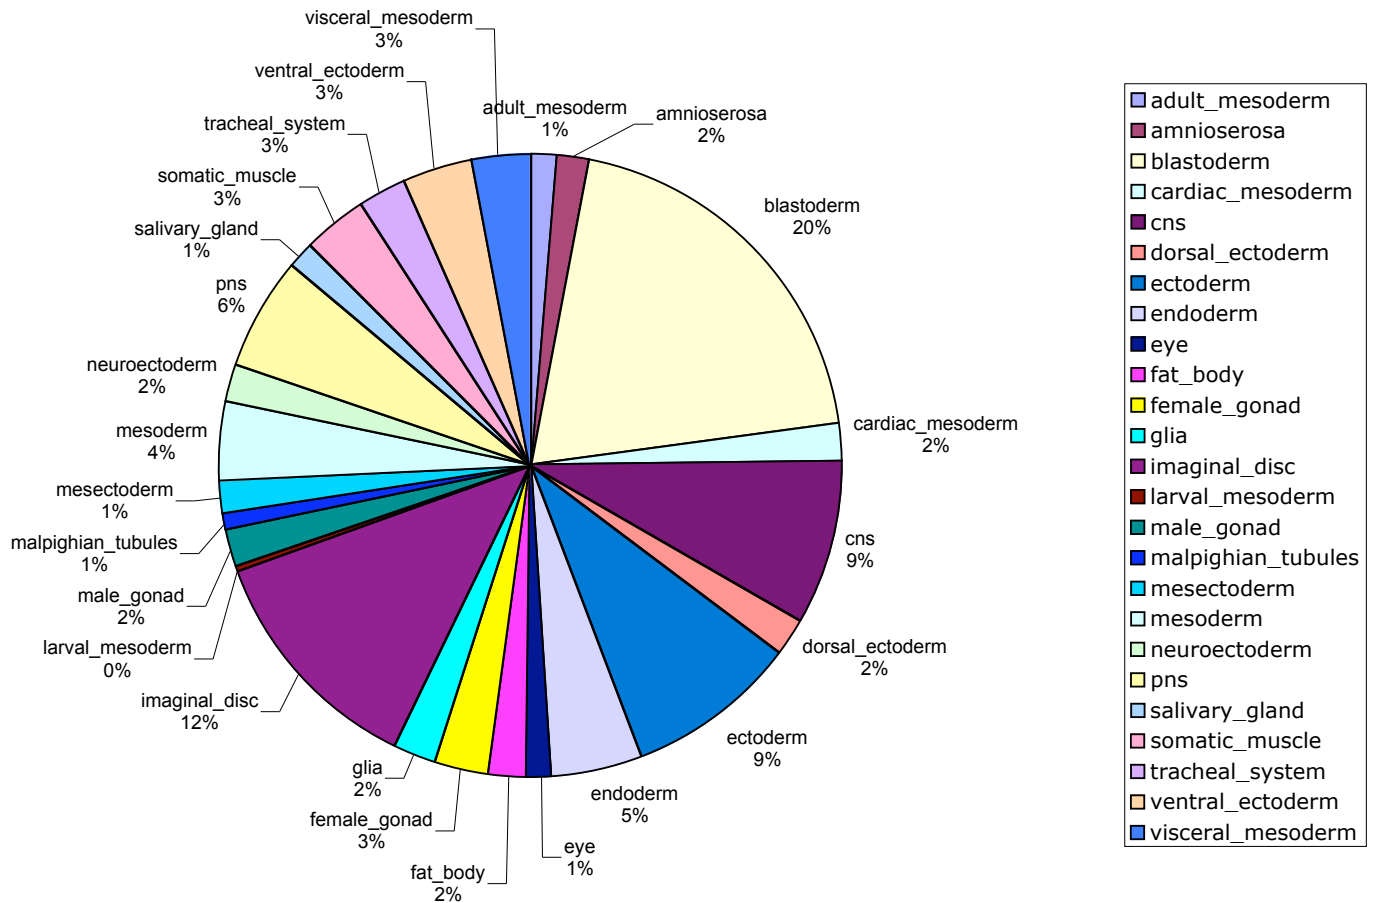

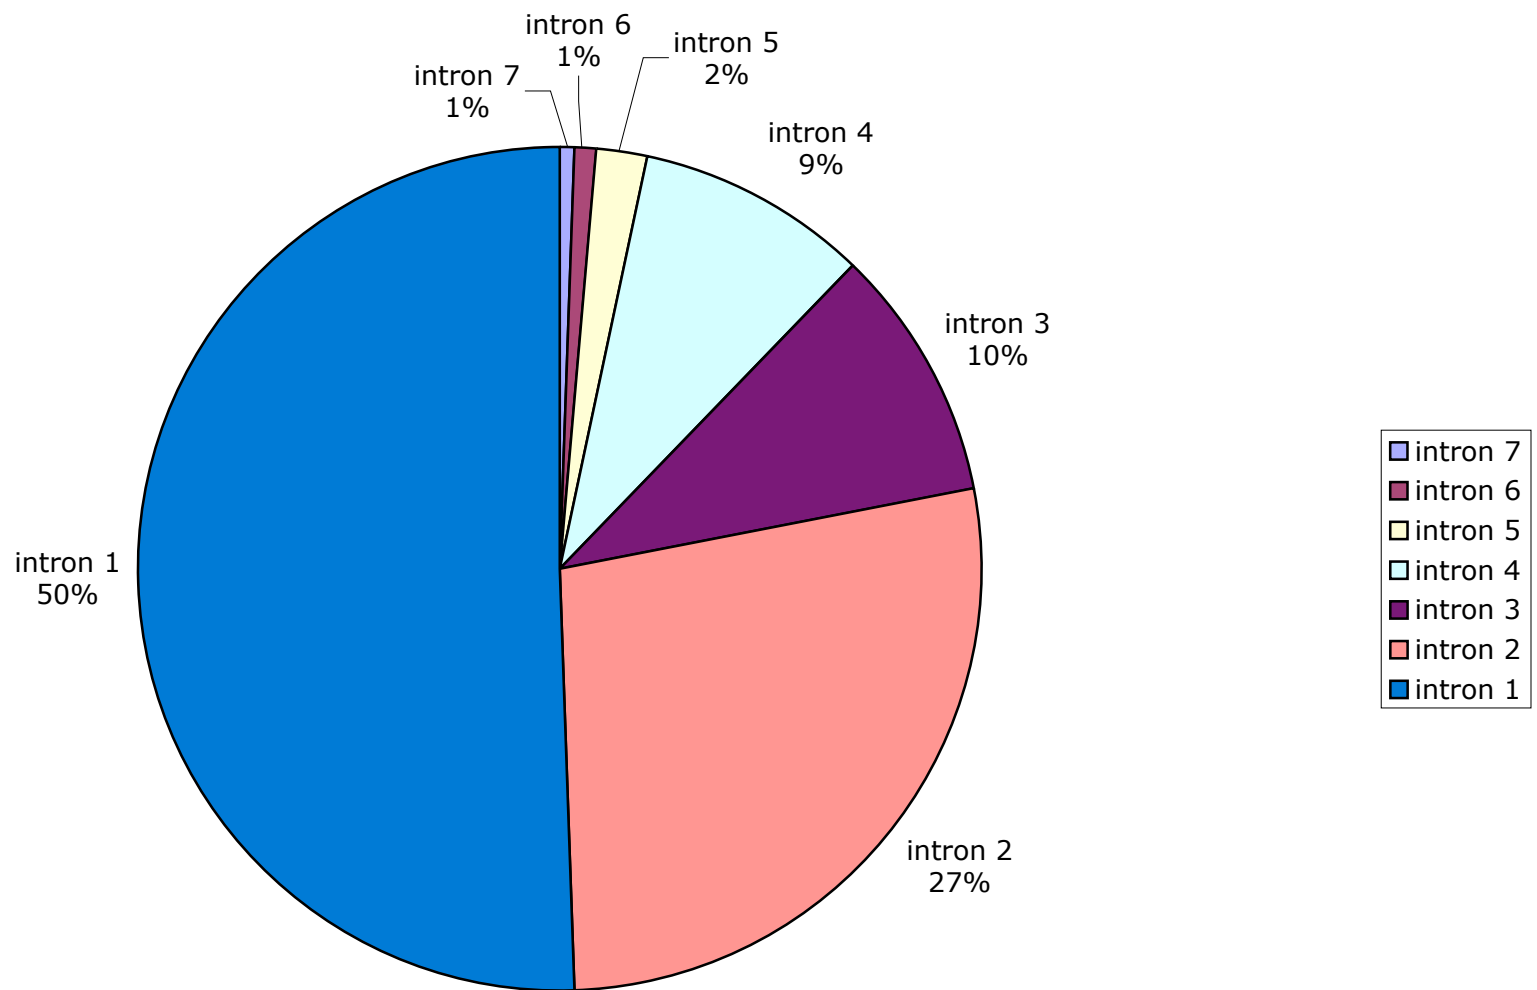

Figure S3: Distribution of REDfly subset CRMs found in introns
