# Supplementary material for: Large-scale analysis of transcriptional cis-regulatory modules reveals both common features and distinct subclasses
Source: PubMed Central journal article supplement (PMC2394749; doi:10.1186/gb-2007-8-6-r101), 2007-06-05
Supplement: gb-2007-8-6-r101-S3.pdf [file gb-2007-8-6-r101-S3.pdf]

### Average conservation fraction of all identical bases

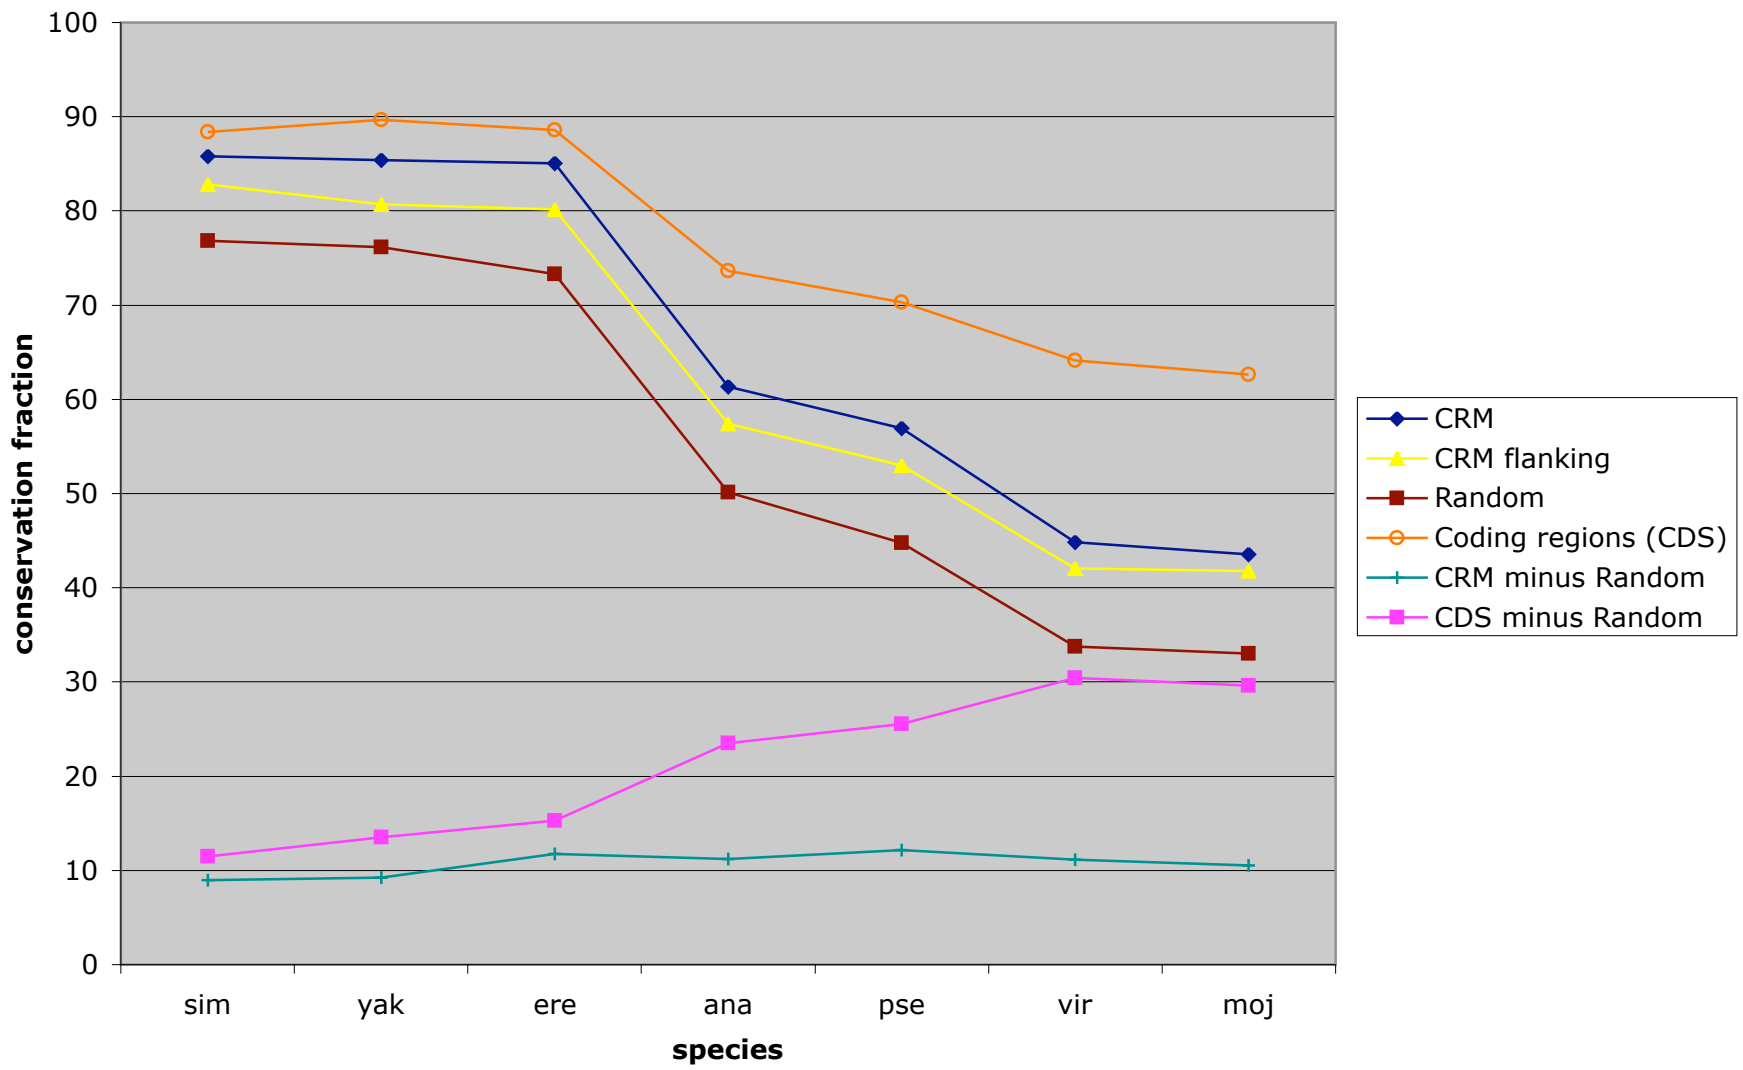

Figure S3-1: Average conservation fraction of all identical bases. See Fig. 3A and legend for details of each data type.

**The distribution of conservation fraction mel/sim**

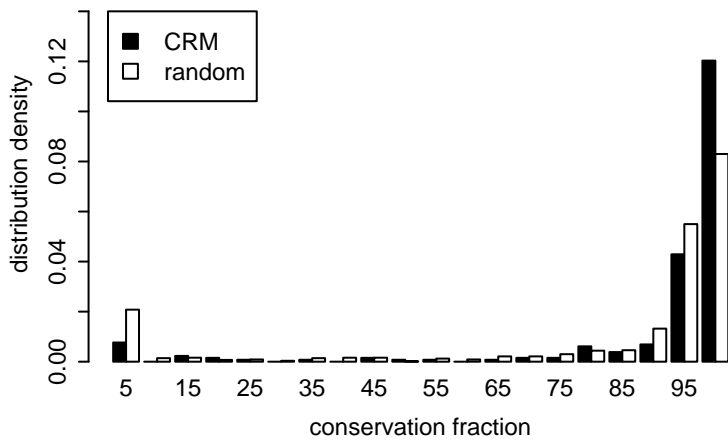

**The distribution of conservation fraction mel/yak**

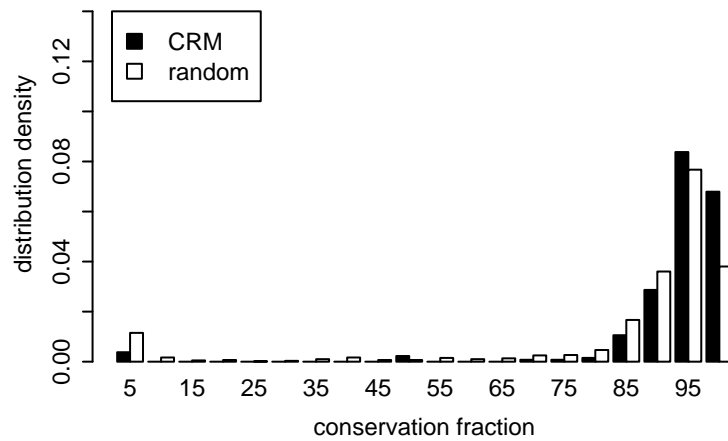

**The distribution of conservation fraction mel/ere**

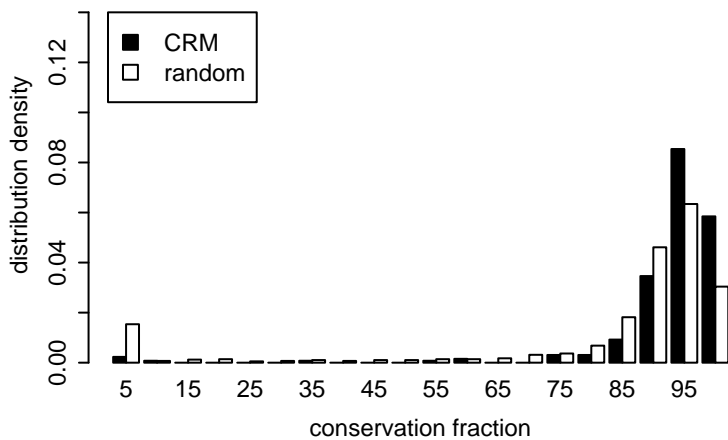

**The distribution of conservation fraction mel/ana**

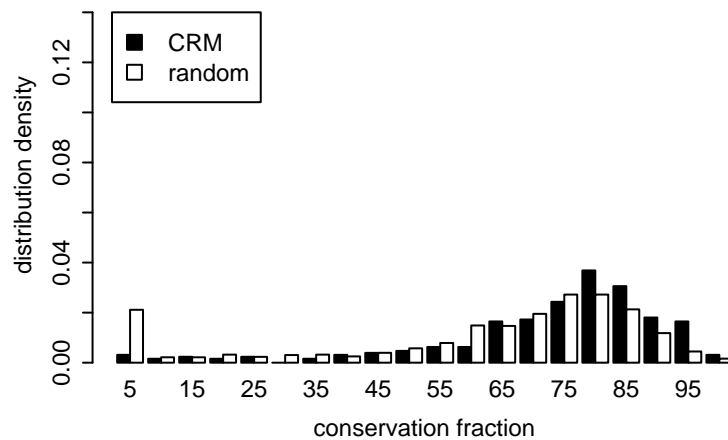

**The distribution of conservation fraction mel/pse**

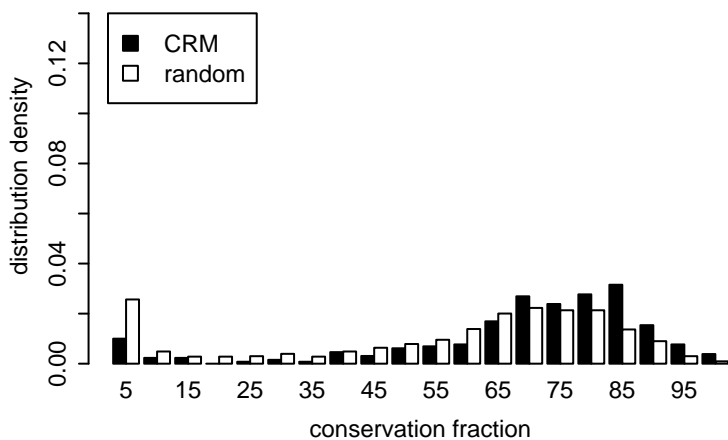

**The distribution of conservation fraction mel/vir**

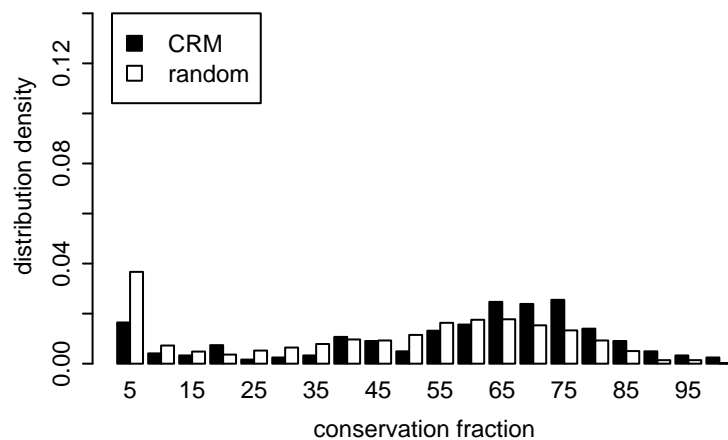

**The distribution of conservation fraction mel/moj**

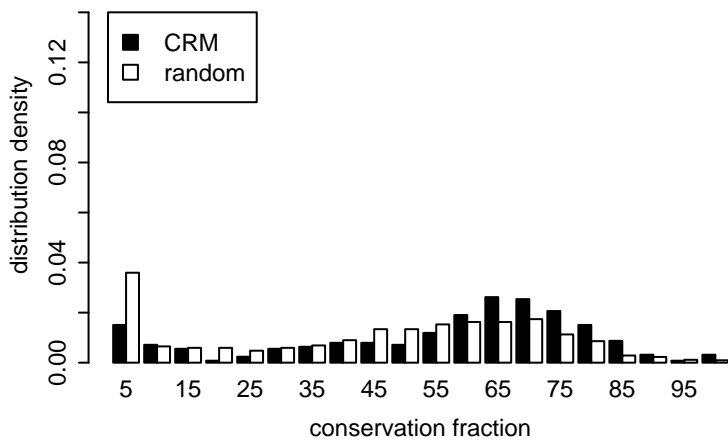

Figure S3-2. Histogram of the conservation fraction for CRMs (black bars) and random non-coding sequences (white bars) for *D. melanogaster* aligned with each of the other species.

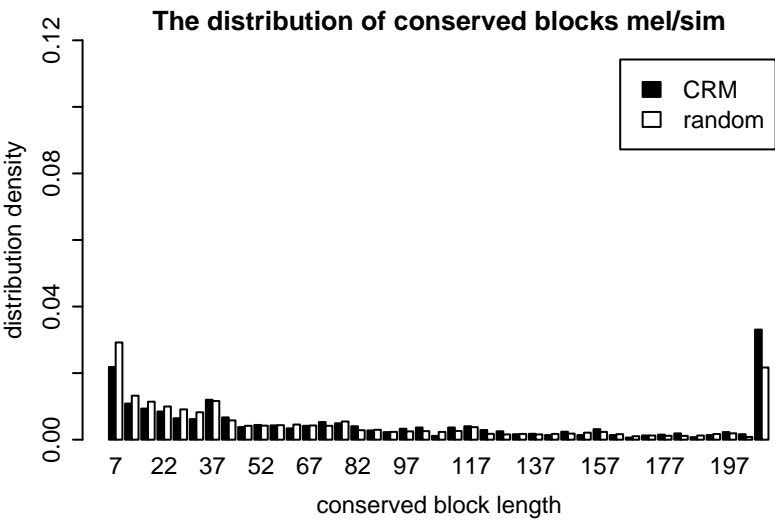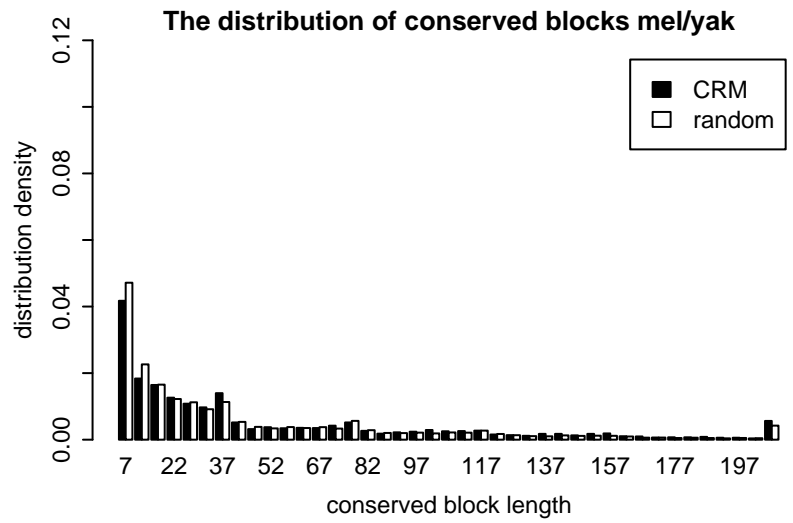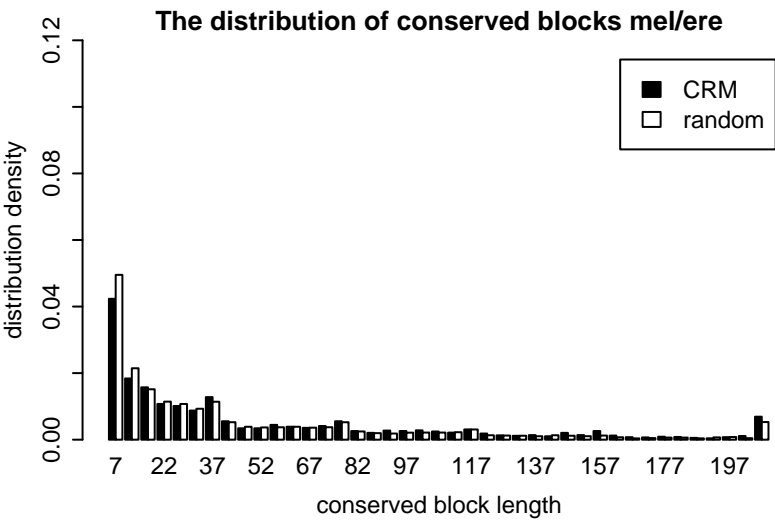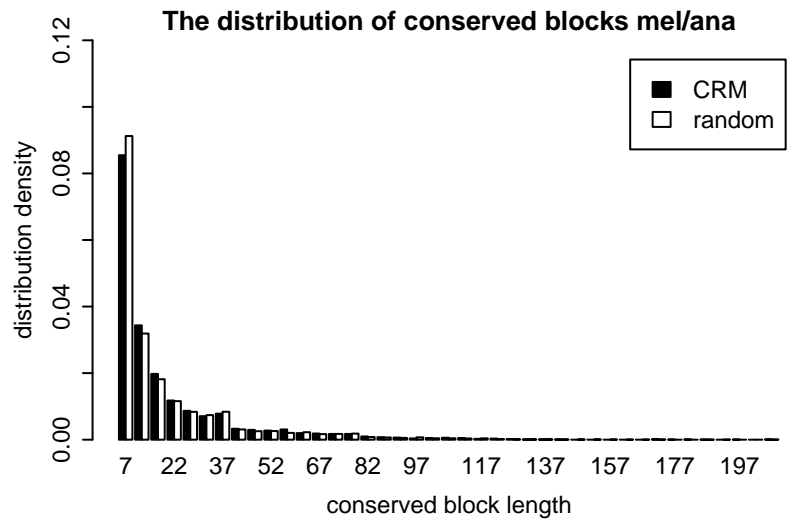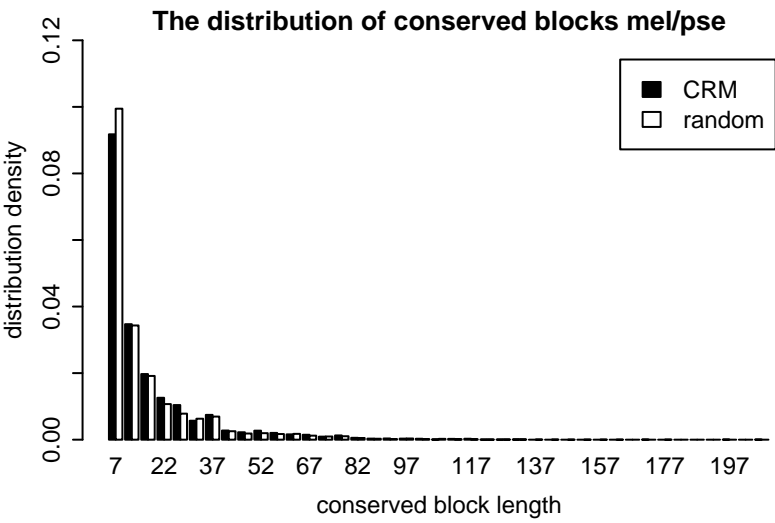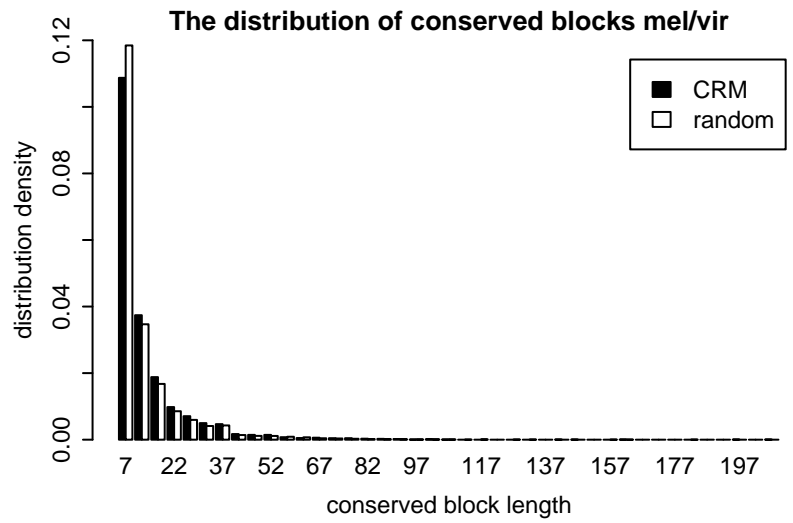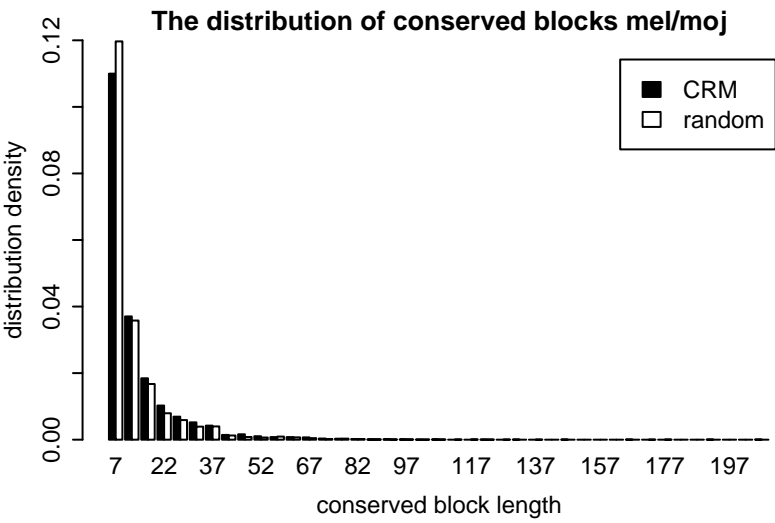

Figure S3-3. Histogram of the conserved block length for CRMs (black bars) and random non-coding sequences (white bars) for *D. melanogaster* aligned with each of the other species.

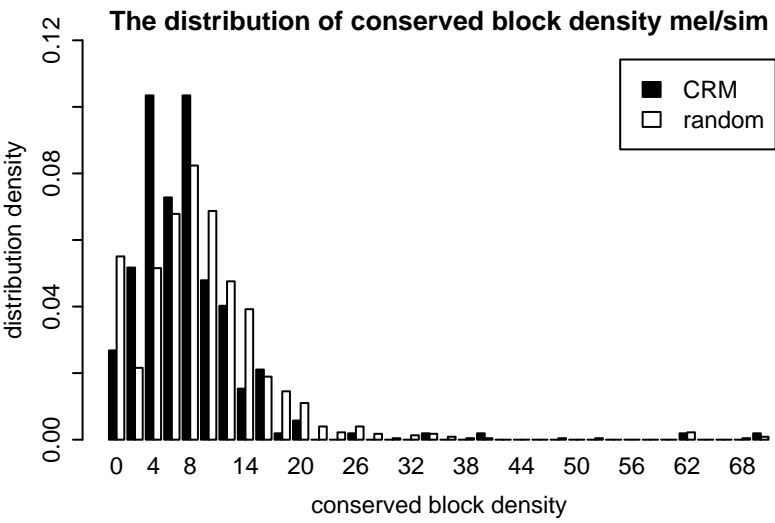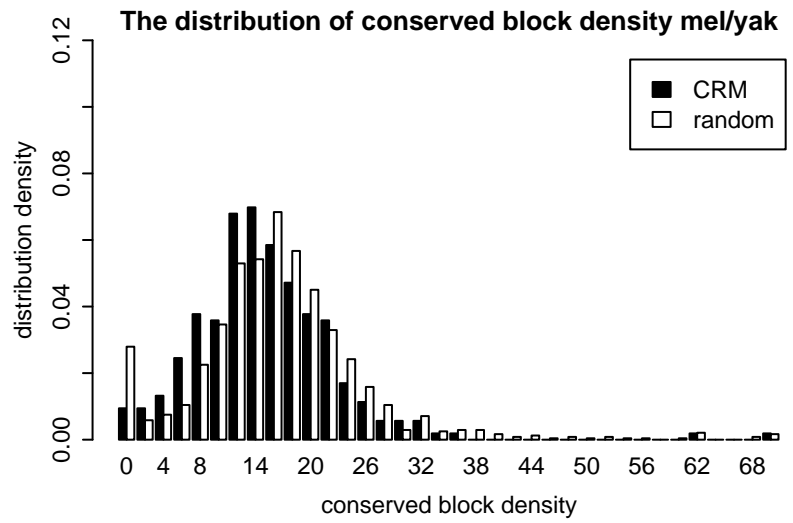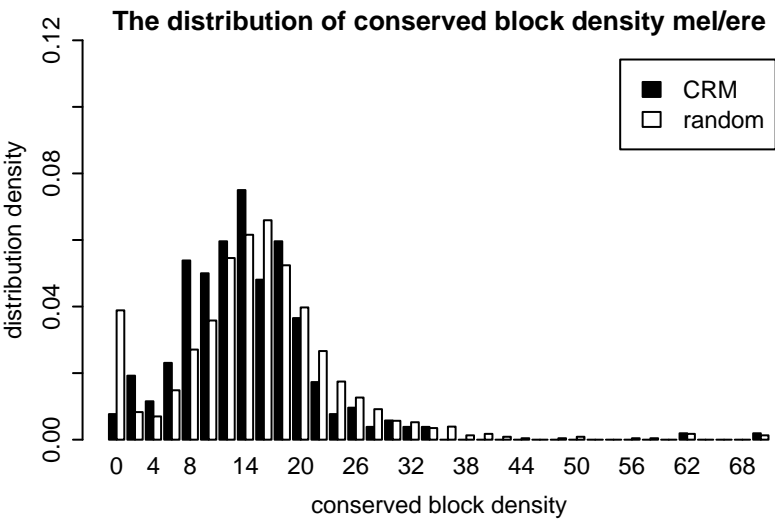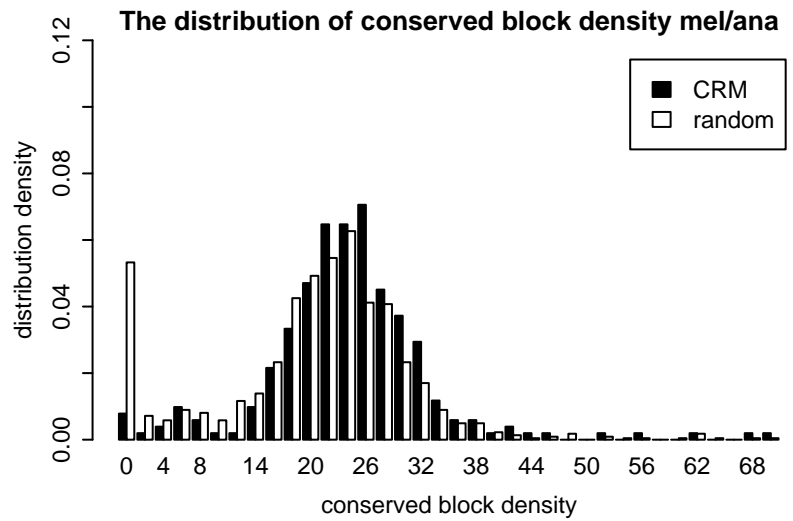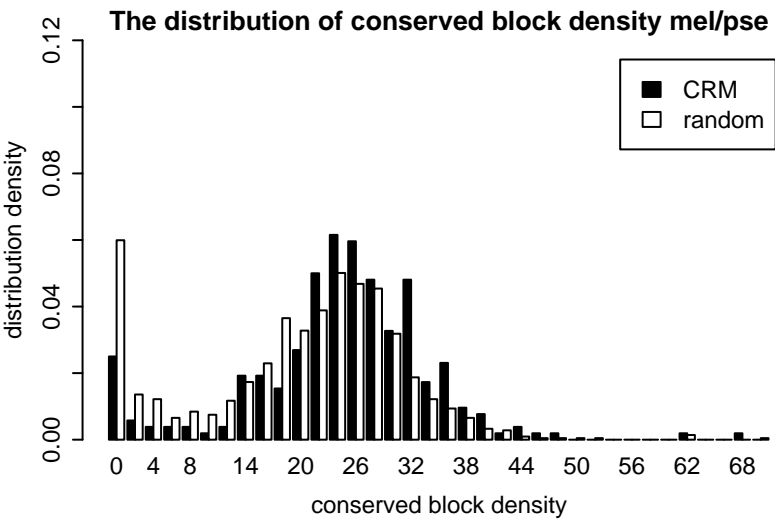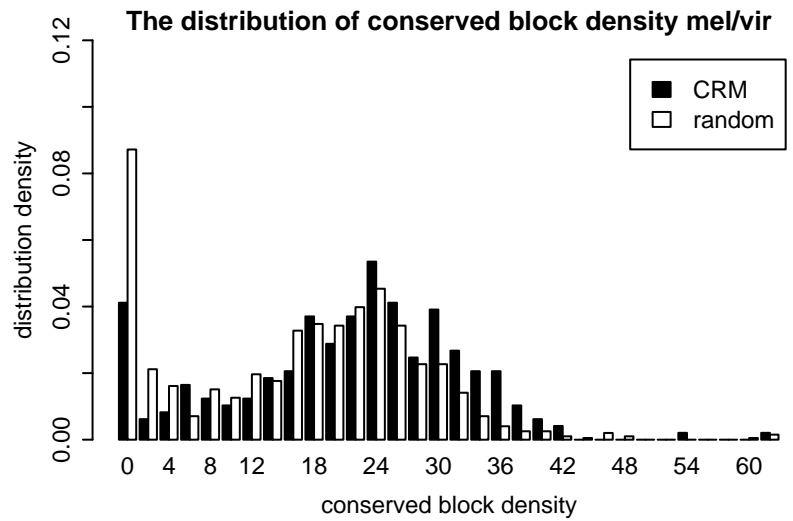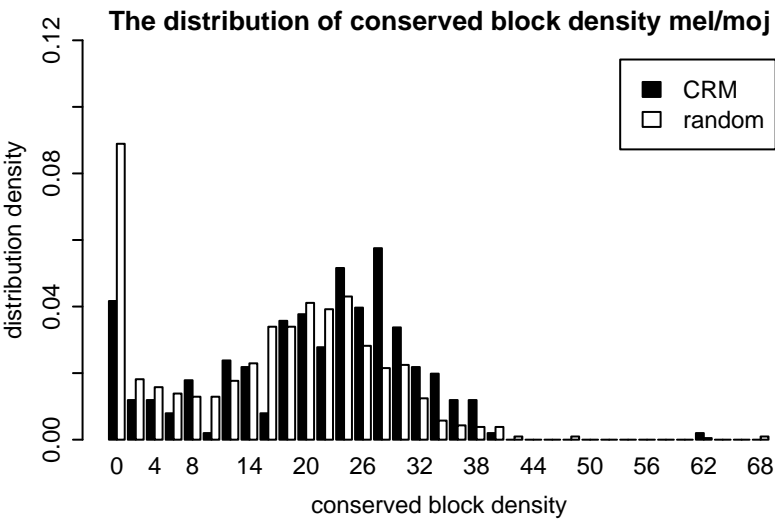

Figure S3-4. Histogram of the conserved block density for CRMs (black bars) and random non-coding sequences (white bars) for *D. melanogaster* aligned with each of the other species.
